# Supplementary material for: Nervonic acid improves fat transplantation by promoting adipogenesis and angiogenesis
Source: PubMed Central journal article supplement (PMC11517738; doi:10.3892/ijmm.2024.5432), 2024-09-30

Figure S1. Accelerating effect of NA during adipogenesis on human tissue-derived MSCs. Representative images of Oil-Red O staining and relative amount of lipid accumulation after 7,14 and 21 days of adipogenic differentiation and treatment with DMSO or 160  $\mu$ M NA in various tissue-derived MSCs: (A) UCB-MSCs, (B) PL-MSCs, (C) WJ-MSCs and (D) BM-MSCs. Scale bars: 100  $\mu$ m. Data are presented as the mean  $\pm$  SD. Statistical significance was assessed using unpaired Student's t-test: \* $P$ <0.05, \*\* $P$ <0.01, \*\*\* $P$ <0.001. BM, bone marrow; DMSO, dimethyl sulfoxide; MSCs, mesenchymal stem cells; NA, nervonic acid; PL, placenta; UCB, umbilical cord blood; WJ, Wharton's jelly.

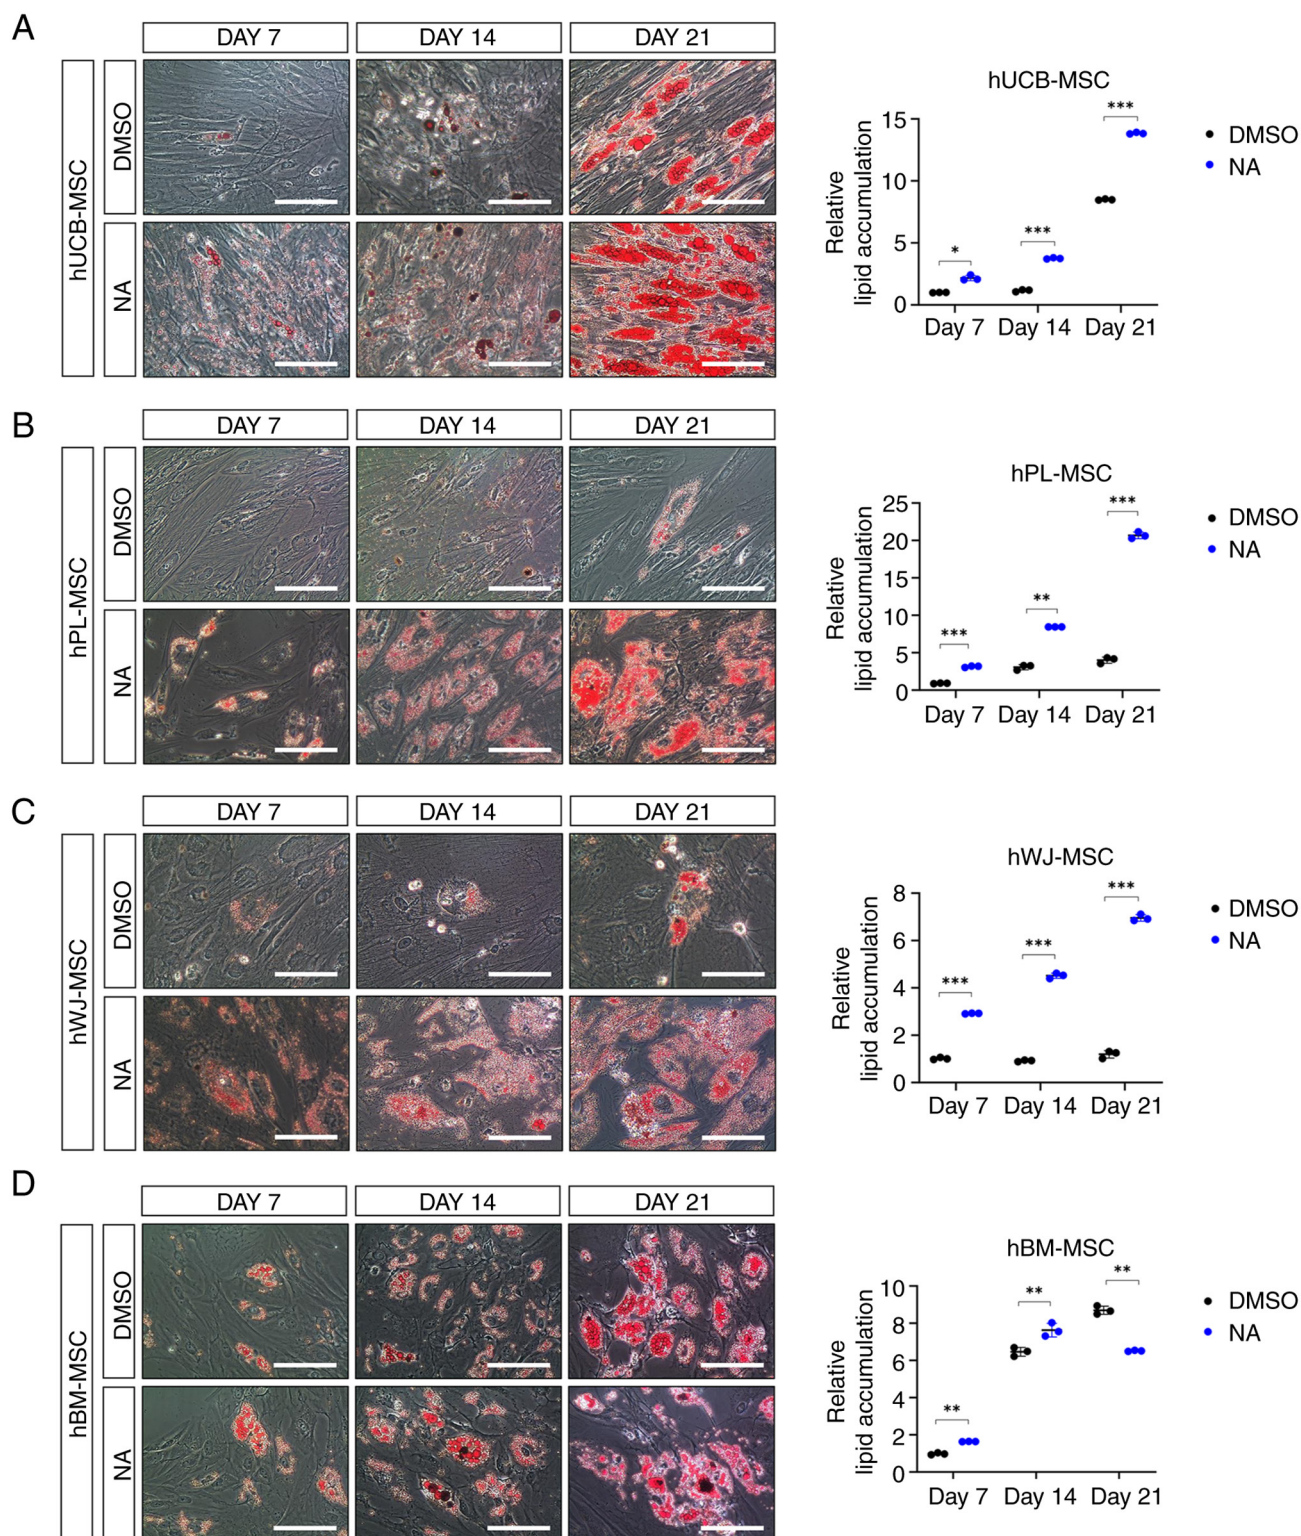

Figure S2. Signaling pathways and their components affected by NA. Changes in expression of molecules involved in the (A) PI3K/Akt and (B) mTOR pathways after 7 days of adipogenic differentiation and treatment with 160  $\mu$ M NA versus dimethyl sulfoxide. Signaling pathways related to the selected DEGs were analyzed using the KEGG mapper. Red boxes indicate upregulated molecules and blue boxes indicate downregulated molecules. NA, nervonic acid.

A

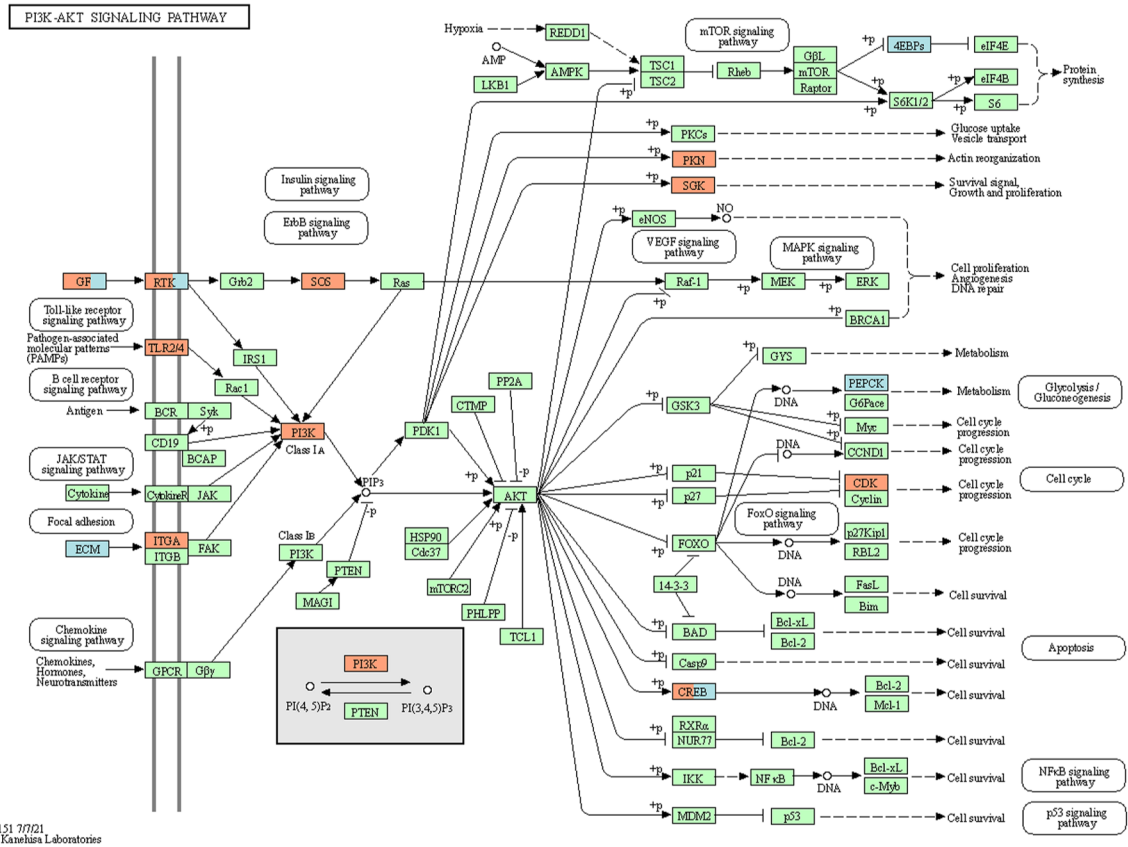

B

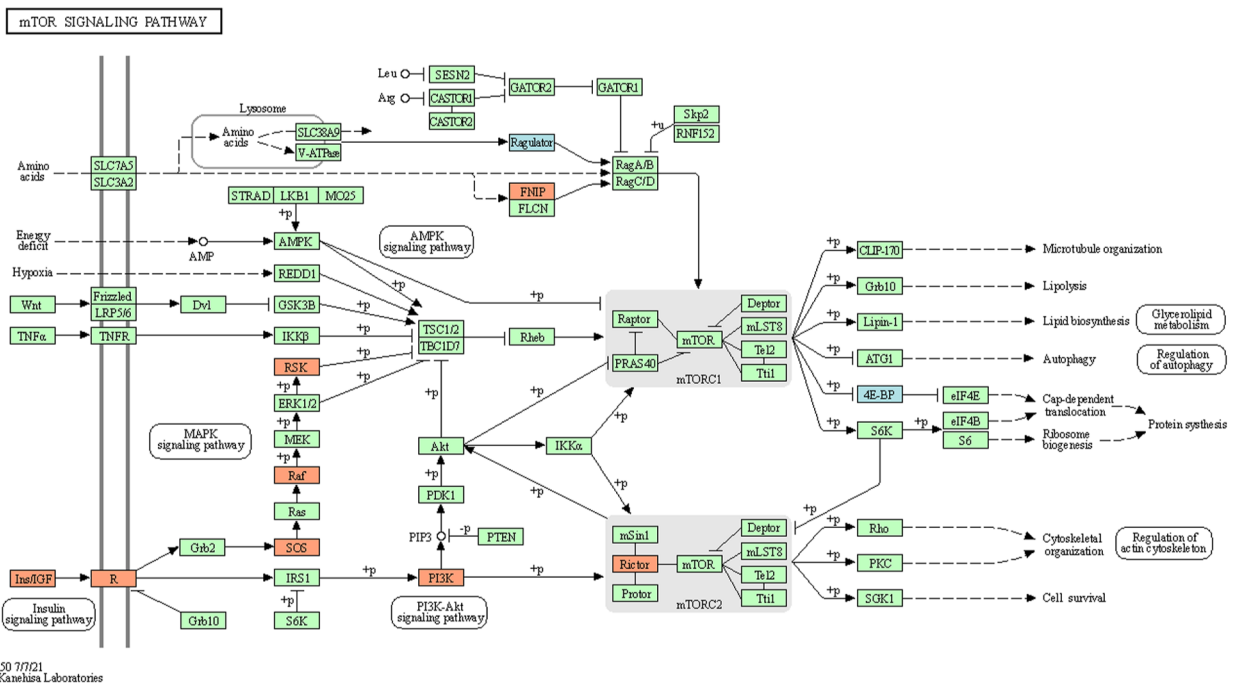

Figure S3. Small perilipin-1<sup>+</sup> adipocytes in the fat graft treated with NA. Immunohistochemical images of perilipin-1 in grafts treated with NA. Black arrows indicate small perilipin-1<sup>+</sup> adipocytes, which represent regenerative adipocytes derived from adipose-derived stem cells in the grafts. Scale bars: 100  $\mu$ m. NA, nervonic acid.

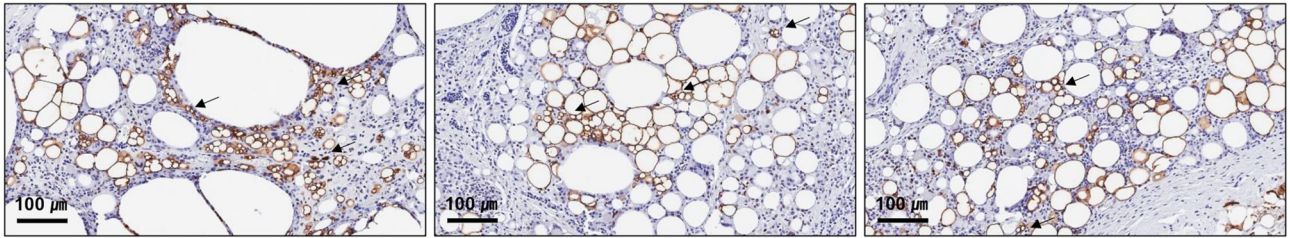

Supplement: Supplementary_Data.pdf [file Supplementary_Data.pdf]
